# Supplementary material
Source: PubMed Central journal article supplement (PMC4896488)
Supplement: NIHMS790554-supplement-Table_S1.pdf [file NIHMS790554-supplement-Table_S1.pdf]

Supplemental Table 1

| Signal                                                                | Increased Ratio | Public ID | Gene Title                                                                                | Gene Symbol   |
|-----------------------------------------------------------------------|-----------------|-----------|-------------------------------------------------------------------------------------------|---------------|
| <b>Apoptosis-related genes</b>                                        |                 |           |                                                                                           |               |
| 577.3                                                                 | 2.828           | AV216351  | Cd27 binding protein (Hindu God of destruction)                                           | MGI:1353606   |
| 9582                                                                  | 2               | AV274748  | myeloid cell leukemia sequence 1                                                          | Mcl1          |
| <b>Cell cycle and cell growth-related genes</b>                       |                 |           |                                                                                           |               |
| 1957.3                                                                | 8               | NM_009829 | cyclin D2                                                                                 | Ccnd2         |
| 9982.1                                                                | 2.639           | BB386653  | V-erb-a erythroblastic leukemia viral oncogene homolog 4 (avian)                          | ErbB4         |
| 191.1                                                                 | 2.639           | AF104414  | large tumor suppressor                                                                    | Lats1         |
| 43440.3                                                               | 2.144           | BB392869  | armadillo repeat containing, X-linked 2                                                   | Armcx2        |
| 7550.9                                                                | 2.297           | NM_010592 | Jun proto-oncogene related gene d1                                                        | Jund1         |
| 552.9                                                                 | 3.249           | BQ177165  | trophoblast glycoprotein                                                                  | Tpbg          |
| 54787.1                                                               | 2.144           | BE197350  | mortality factor 4 like 1                                                                 | Morf4l1       |
| 15197.5                                                               | 2               | BB249447  | neccdin /// PCTAIRE-motif protein kinase 1                                                | Ndn /// Pctk1 |
| 7409.8                                                                | 2.462           | BF225802  | insulin-like growth factor binding protein 5                                              | Igfbp5        |
| 932                                                                   | 3.732           | BB241535  | suppressor of cytokine signaling 3                                                        | Socs3         |
| 279.9                                                                 | 4.925           | NM_008341 | insulin-like growth factor binding protein 1                                              | Igfbp1        |
| <b>Chemokine-related genes</b>                                        |                 |           |                                                                                           |               |
| 272.5                                                                 | 3.732           | NM_023785 | chemokine (C-X-C motif) ligand 7                                                          | Cxcl7         |
| 4236.1                                                                | 6.063           | D87747    | chemokine (C-X-C motif) receptor 4                                                        | Cxcr4         |
| 586.5                                                                 | 4.925           | BB124954  | Chemokine (C-C motif) receptor 9                                                          | Ccr9          |
| 485                                                                   | 2.639           | BB532202  | fibromodulin                                                                              | Fmod          |
| 5776.4                                                                | 2.144           | BM218838  | Slit homolog 2 (Drosophila)                                                               | Slit2         |
| <b>Cell structure, adhesion, cytoskeleton-related genes</b>           |                 |           |                                                                                           |               |
| 1424                                                                  | 2.144           | BB533095  | syndecan 1                                                                                | Sdc1          |
| 11467.8                                                               | 3.482           | NM_007393 | actin, beta, cytoplasmic                                                                  | Actb          |
| 6060.4                                                                | 2.828           | BB160417  | coactosin-like 1 (Dictyostelium)                                                          | Cotl1         |
| 442.4                                                                 | 3.031           | BB396016  | engulfment and cell motility 1, ced-12 homolog (C. elegans)                               | Elmo1         |
| 197.9                                                                 | 32              | AF218081  | killer cell lectin-like receptor subfamily A, member 12                                   | Klra12        |
| 855                                                                   | 2.297           | A1429565  | Neuritin 1                                                                                | Nrn1          |
| 8832.8                                                                | 2               | BC028835  | nuclear pore membrane protein 121                                                         | Pom121        |
| 2514.7                                                                | 2.297           | AV336001  | pleckstrin homology domain containing, family H (with MyTH4 domain) member 1              | Plekhh1       |
| 1497.4                                                                | 3.732           | BB386302  | Microtubule-associated protein 2                                                          | Mtap2         |
| 40985.4                                                               | 2               | NM_007984 | fascin homolog 1, actin bundling protein (Strongylocentrotus purpuratus)                  | Fscn1         |
| 124651                                                                | 2.144           | NM_011653 | tubulin, alpha 1                                                                          | Tuba1         |
| <b>Intracellular metabolism-related genes</b>                         |                 |           |                                                                                           |               |
| 235.2                                                                 | 90.51           | BB225177  | Phosphoenolpyruvate carboxykinase 1, cytosolic                                            | Pck1          |
| 266.5                                                                 | 11.314          | NM_013792 | alpha-N-acetylglucosaminidase (Sanfilippo disease IIIB)                                   | Naglu         |
| 2814.7                                                                | 2.297           | BG067274  | one cut domain, family member 1                                                           | Onecut1       |
| 555.1                                                                 | 3.482           | BM228113  | hyaluronic acid binding protein 4                                                         | Habp4         |
| 24831.8                                                               | 6.498           | BB504983  | similar to phosphatidylserine decarboxylase /// RIKEN cDNA 9030221M09 gene                | MGC65558      |
| 12524.8                                                               | 2               | BB464434  | selenoprotein W, muscle 1                                                                 | Sepw1         |
| 1274.1                                                                | 2.144           | AV292769  | uroporphyrinogen decarboxylase                                                            | Urod          |
| 893.1                                                                 | 4.925           | BC003305  | lipoprotein lipase                                                                        | Lpl           |
| 2397.7                                                                | 2.462           | NM_029787 | diaphorase 1 (NADH)                                                                       | Dia1          |
| 225.6                                                                 | 5.278           | BB449626  | 5'-nucleotidase, cytosolic II                                                             | Nt5c2         |
| 1096.9                                                                | 2               | BB732183  | phosphatidylinositol glycan, class H                                                      | Pigh          |
| 10996.4                                                               | 2               | BB458645  | acid phosphatase-like 2                                                                   | Acpl2         |
| 348.5                                                                 | 18.379          | BB360745  | sphingosine-1-phosphate phosphatase 2                                                     | Sgpp2         |
| 28099.8                                                               | 2.144           | AW558862  | hexokinase 1 /// ribosomal protein L17 /// similar to Rpl17 protein                       | Hk1           |
| 701.8                                                                 | 2               | AV259240  | carbohydrate sulfotransferase 11 /// phosphatase and actin regulator 1                    | Chst11        |
| 315.3                                                                 | 9.849           | AK005459  | RIKEN cDNA 1600014K23 gene                                                                | 1600014K23Rik |
| 47585.8                                                               | 2               | BB454540  | Myristoylated alanine rich protein kinase C substrate                                     | Marcks        |
| 12468.7                                                               | 2               | BB272730  | methionine adenosyltransferase II, alpha                                                  | Mat2a         |
| 840.1                                                                 | 2.144           | B1905689  | NADH dehydrogenase (ubiquinone) 1 beta subcomplex, 10                                     | Ndufb10       |
| <b>RNA processing genes</b>                                           |                 |           |                                                                                           |               |
| 6017                                                                  | 2.144           | BB085604  | RIKEN cDNA 2610031L17 gene                                                                | 2610031L17Rik |
| 3818.3                                                                | 2.144           | L36663    | heterogeneous nuclear ribonucleoprotein A/B                                               | Hnrpab        |
| 1749.1                                                                | 2               | AW228855  | apoptotic chromatin condensation inducer 1                                                | Acin1         |
| 1782.6                                                                | 2.297           | AF250135  | splicing factor, arginine/serine-rich 2 (SC-35)                                           | Sfrs2         |
| 536.7                                                                 | 2.462           | A1449122  | Tudor domain containing 3                                                                 | Tdrd3         |
| 1530.7                                                                | 2               | BG064045  | TruB pseudouridine (psi) synthase homolog 2 (E. coli)                                     | Trub2         |
| 814.3                                                                 | 2.297           | AW556977  | poly(rC) binding protein 2                                                                | Pcbp2         |
| 36996.3                                                               | 2.828           | BB703394  | Transcribed locus                                                                         | ---           |
| 1332.6                                                                | 2.639           | BB397392  | protein phosphatase 1, regulatory (inhibitor) subunit 8                                   | Ppp1r8        |
| 1630.7                                                                | 2               | BC025093  | brix domain containing 1                                                                  | Bxdc1         |
| 3122.8                                                                | 2.297           | NM_010717 | LIM-domain containing, protein kinase                                                     | Limk1         |
| 2979.6                                                                | 3.732           | BB370469  | mitogen activated protein kinase kinase kinase 12                                         | Map3k12       |
| 1610.1                                                                | 2               | AV101824  | ribonuclease T2                                                                           | Rnaset2       |
| 847.5                                                                 | 2               | BC020532  | Rap guanine nucleotide exchange factor (GEF) 3                                            | Rapgef3       |
| 379.5                                                                 | 2.297           | BB667222  | mitogen activated protein kinase kinase kinase kinase 2                                   | Map4k2        |
| <b>Protein modification and processing, translation-related genes</b> |                 |           |                                                                                           |               |
| 12693.8                                                               | 2.297           | AV124739  | ribosomal protein L35                                                                     | Rpl35         |
| 8647.6                                                                | 2.297           | BE993872  | ribosomal protein L14                                                                     | Rpl14         |
| 34126.1                                                               | 2.144           | BC010987  | ribosomal protein S28                                                                     | Rps28         |
| 5006                                                                  | 2.144           | AV123618  | ribosomal protein S21                                                                     | Rps21         |
| 3730.6                                                                | 2.144           | NM_009091 | ribosomal protein S15                                                                     | Rps15         |
| 29309.8                                                               | 2.144           | A1413680  | ribosomal protein S12                                                                     | Rps12         |
| 23580.5                                                               | 2.462           | AA762498  | ribosomal protein S9                                                                      | Rps9          |
| 11209.6                                                               | 2.462           | AA208652  | ribosomal protein S27                                                                     | Rps27         |
| 4571.7                                                                | 2.462           | NM_011289 | ribosomal protein L27                                                                     | Rpl27         |
| 3260.4                                                                | 2.297           | BB000887  | ribosomal protein S10                                                                     | Rps10         |
| 6534.6                                                                | 2.144           | AV066985  | ribosomal protein L37a                                                                    | Rpl37a        |
| 39841.9                                                               | 2.144           | A1324936  | ribosomal protein L13a                                                                    | Rpl13a        |
| 1880                                                                  | 2.144           | NM_016738 | ribosomal protein L13                                                                     | Rpl13         |
| 66077.2                                                               | 2.144           | AU015377  | eukaryotic translation initiation factor 4, gamma 2                                       | Eif4g2        |
| 1535.2                                                                | 4.287           | BM121819  | Eukaryotic translation initiation factor 2, subunit 3, structural gene Y-linked           | Eif2s3y       |
| 1549.9                                                                | 2.297           | BM120823  | eukaryotic translation initiation factor 4E member 2                                      | Eif4e2        |
| 16925.9                                                               | 2.462           | NM_011029 | laminin receptor 1 (ribosomal protein SA)                                                 | Lamr1         |
| 1875.1                                                                | 2.828           | NM_007990 | Finkel-Biskis-Reilly murine sarcoma virus (FBR-MuSV) ubiquitously expressed (fox derived) | Fau           |
| 974.1                                                                 | 2.297           | B1689507  | pumilio 2 (Drosophila)                                                                    | Pum2          |
| 77108.3                                                               | 2               | NM_133354 | SMT3 suppressor of mif two 3 homolog 2 (yeast)                                            | Sumo2         |

|                                                                               |        |            |                                                                                 |               |
|-------------------------------------------------------------------------------|--------|------------|---------------------------------------------------------------------------------|---------------|
| 7581.5                                                                        | 2      | AV209126   | signal recognition particle 14                                                  | Srp14         |
| 4363.4                                                                        | 2.144  | AV157500   | translocator of inner mitochondrial membrane 17b                                | Timm17b       |
| 7751.3                                                                        | 2.297  | AV347477   | S-phase kinase-associated protein 1A                                            | Skp1a         |
| 1416.6                                                                        | 2.144  | AV102733   | serine carboxypeptidase 1                                                       | Scepep1       |
| 645.2                                                                         | 2      | AI649104   | RIKEN cDNA 4930453N24 gene                                                      | 4930453N24Rik |
| 1100.2                                                                        | 2      | AI152156   | proliferation-associated 2G4                                                    | Pa2g4         |
| 2593.2                                                                        | 2.828  | AV300794   | poly(rC) binding protein 4                                                      | Pcbp4         |
| 4276.7                                                                        | 2      | BI666155   | guanine nucleotide binding protein-like 2 (nucleolar)                           | Gnl2          |
| 3312.9                                                                        | 2.144  | AV021593   | mitochondrial ribosomal protein L52                                             | Mrpl52        |
| <b>Signal transduction-related genes</b>                                      |        |            |                                                                                 |               |
| 243.7                                                                         | 64     | AB013898   | tumor necrosis factor receptor superfamily, member 11b (osteoprotegerin)        | Tnfrsf11b     |
| 548.6                                                                         | 2.144  | BC013820   | rhotekin                                                                        | Rtkn          |
| 2309.5                                                                        | 2.144  | BB175009   | Fibroblast growth factor 14                                                     | Fgf14         |
| 1849.9                                                                        | 2.639  | BB550124   | transglutaminase 2, C polypeptide                                               | Tgm2          |
| 1277.6                                                                        | 2.144  | BG071242   | Muskelin 1, intracellular mediator containing kelch motifs                      | Mkln1         |
| 242.6                                                                         | 8.574  | BI966456   | Chordin-like 1                                                                  | Chrdl1        |
| 888.5                                                                         | 2.462  | NM_009062  | regulator of G-protein signaling 4                                              | Rgs4          |
| 8236                                                                          | 2.144  | BM118129   | Odd Oz/ten-m homolog 3 (Drosophila)                                             | Odz3          |
| 2299.6                                                                        | 2.462  | AV209892   | protein kinase inhibitor, gamma                                                 | PkiG          |
| 13290.2                                                                       | 2      | BB248904   | SH3-binding domain glutamic acid-rich protein like                              | Sh3bgrl       |
| 2169.9                                                                        | 2      | BB529038   | dorso-medial telencephalon gene 2                                               | Dmt2          |
| 3939.2                                                                        | 2.639  | NM_018884  | PDZ domain containing RING finger 3                                             | Pdzm3         |
| 29395.9                                                                       | 4.287  | NM_023879  | retinitis pigmentosa GTPase regulator interacting protein 1                     | Rpgrip1       |
| 4728.9                                                                        | 2.462  | AV349116   | Rho GTPase activating protein 11A                                               | Arngap11a     |
| 7046.7                                                                        | 2      | BG065186   | PDGFA associated protein 1                                                      | Pdap1         |
| 37989                                                                         | 2.144  | BC025837   | SH3-binding kinase 1                                                            | Sbk1          |
| 197379                                                                        | 2      | AFX-MURINE | ankyrin repeat and FYVE domain containing 1 /// catechol-O-methyltransferase    | Ankyf1        |
| <b>DNA replication, transcription, transcription regulation-related genes</b> |        |            |                                                                                 |               |
| 974.3                                                                         | 4.595  | AF127244   | jumonji, AT rich interactive domain 1D (Rbp2 like)                              | Jarid1d       |
| 909.2                                                                         | 4      | NM_013702  | Unc4.1 homeobox (C. elegans)                                                    | Uncx4.1       |
| 5492.7                                                                        | 3.249  | NM_009718  | neurogenin 2                                                                    | Neurog2       |
| 507.7                                                                         | 3.031  | AK008173   | NK6 transcription factor related, locus 2 (Drosophila)                          | Nkx6-2        |
| 333.8                                                                         | 3.031  | AA407331   | MAD homolog 2 (Drosophila)                                                      | Smad2         |
| 817                                                                           | 2.297  | W91024     | histone 1, H2ad                                                                 | Hist1h2ad     |
| 2143.8                                                                        | 2.828  | BB175494   | transcription factor 7-like 2, T-cell specific, HMG-box                         | Tcf7l2        |
| 15813.9                                                                       | 2.639  | AV127023   | high mobility group box 1                                                       | Hmgb1         |
| 7955.4                                                                        | 2.144  | AI648759   | high mobility group box 1                                                       | Hmgb1         |
| 954.2                                                                         | 2.828  | BB168668   | general transcription factor II H, polypeptide 4                                | Gtf2h4        |
| 1582.5                                                                        | 2.144  | BB099487   | minichromosome maintenance deficient 6 (MIS5 homolog, S. pombe) (S. cerevisiae) | Mcm6          |
| 79032.6                                                                       | 2.639  | BB252350   | H3 histone, family 3A                                                           | H3f3a         |
| 1415.2                                                                        | 2.639  | NM_030082  | histone 3, H2ba                                                                 | Hist3h2ba     |
| 1657.1                                                                        | 4.287  | AA210261   | DEAD (Asp-Glu-Ala-Asp) box polypeptide 3, Y-linked                              | Ddx3y         |
| 67673.1                                                                       | 2      | BB476615   | DEAD (Asp-Glu-Ala-Asp) box polypeptide 17                                       | Ddx17         |
| 9197.6                                                                        | 2.462  | BB468410   | CDNA sequence BC024760                                                          | Insm1         |
| 462                                                                           | 2.639  | BI735871   | zinc finger protein 28                                                          | Zfp28         |
| 3769.1                                                                        | 2.462  | NM_010134  | engrailed 2                                                                     | En2           |
| 1974.1                                                                        | 2      | BB739342   | Sal-like 1 (Drosophila)                                                         | Sall1         |
| 2568.7                                                                        | 2.297  | U80011     | paired-like homeodomain transcription factor 2                                  | Pitx2         |
| 1769.8                                                                        | 2.144  | BB238427   | ring finger protein 26                                                          | Rnf26         |
| 294.9                                                                         | 2.144  | AK020027   | RB1-inducible coiled-coil 1                                                     | Rb1cc1        |
| 1771.3                                                                        | 2.297  | BC017609   | orthodenticle homolog 2 (Drosophila)                                            | Otx2          |
| 944.4                                                                         | 3.482  | BE980601   | Chromodomain helicase DNA binding protein 7                                     | Chd7          |
| 4111.8                                                                        | 2.144  | BG072739   | SRY-box containing gene 11                                                      | Sox11         |
| 6812.2                                                                        | 2.639  | BB292639   | doublesex and mab-3 related transcription factor like family A2                 | Dmrt2         |
| 2576                                                                          | 2.144  | BB561515   | hairy and enhancer of split 5 (Drosophila)                                      | Hes5          |
| 1933.7                                                                        | 2.144  | NM_010446  | forkhead box A2                                                                 | Foxa2         |
| 841.9                                                                         | 2      | AK019181   | transcription elongation factor B (SIII), polypeptide 2                         | Tceb2         |
| 636.9                                                                         | 2.297  | NM_010150  | nuclear receptor subfamily 2, group F, member 6                                 | Nr2f6         |
| 2524.7                                                                        | 2.639  | BM116592   | neurogenic differentiation 1                                                    | Neurod1       |
| 192.3                                                                         | 18.379 | BB227141   | zinc finger protein 367                                                         | Zfp367        |
| 897.3                                                                         | 4.925  | NM_011376  | single-minded homolog 1 (Drosophila)                                            | Sim1          |
| 179                                                                           | 6.0628 | NM_008852  | paired-like homeodomain transcription factor 3                                  | Pitx3         |
| <b>Transport-related genes</b>                                                |        |            |                                                                                 |               |
| 1614.6                                                                        | 3.031  | AV334638   | solute carrier family 18 (vesicular monoamine), member 2                        | Slc18a2       |
| 730.1                                                                         | 25.992 | NM_010020  | solute carrier family 6 (neurotransmitter transporter, dopamine), member 3      | Slc6a3        |
| 361.4                                                                         | 17.148 | AW545361   | Der1-like domain family, member 1                                               | Der1          |
| 4221.8                                                                        | 5.657  | NM_009946  | complexin 2                                                                     | Cplx2         |
| 1553.9                                                                        | 3.249  | BB448377   | solute carrier family 4 (anion exchanger), member 1                             | Slc4a1        |
| 227.8                                                                         | 13.929 | BI714072   | Metaxin 2                                                                       | Mtx2          |
| 675.4                                                                         | 5.657  | BB528233   | Ubiquitously transcribed tetratricopeptide repeat gene, Y chromosome            | Uty           |
| 4926.5                                                                        | 2.639  | BM207588   | solute carrier family 2 (facilitated glucose transporter), member 1             | Slc2a1        |
| 312.4                                                                         | 17.148 | BQ176550   | synaptotagmin-like homologue lacking C2 domains b                               | MGI:2443248   |
| 782.7                                                                         | 2.639  | AV047063   | aquaporin 11                                                                    | Aqp11         |
| 21548.9                                                                       | 2.144  | BF537798   | receptor (calcitonin) activity modifying protein 2                              | Ramp2         |
| 968.7                                                                         | 2      | BB206460   | phosphatidylinositol membrane-associated 1                                      | Pitpnm1       |
| 3328.6                                                                        | 3.732  | AI591480   | phospholipid transfer protein                                                   | Pitp          |
| 852.4                                                                         | 2      | BB514802   | DNA segment, Chr 11, ERATO Doi 333, expressed                                   | D11ErtD333e   |
| 258.1                                                                         | 9.19   | BB822932   | Translocase of outer mitochondrial membrane 70 homolog A (yeast)                | Tom70a        |
| 2085.8                                                                        | 4.925  | AV311770   | hemoglobin Z, beta-like embryonic chain                                         | Hbb-bh1       |
| 80790.5                                                                       | 2      | AV156860   | hemoglobin Y, beta-like embryonic chain                                         | Hbb-y         |
| 276                                                                           | 9.849  | NM_023146  | RAN binding protein 17                                                          | Ranbp17       |
| 1345.5                                                                        | 3.031  | BB041811   | transglutaminase 2, C polypeptide                                               | Tgm2          |
| 2170.5                                                                        | 2      | BB059395   | cDNA sequence BC019806                                                          | BC019806      |
| 3158                                                                          | 2.297  | NM_007507  | ATP synthase, H+ transporting, mitochondrial F1F0 complex, subunit e            | Atp5k         |
| 687.4                                                                         | 4.925  | BB207470   | Ubiquitously transcribed tetratricopeptide repeat gene, Y chromosome            | Uty           |
| <b>Others</b>                                                                 |        |            |                                                                                 |               |
| 5076.8                                                                        | 2.297  | NM_009148  | SEC8-like 1 (S. cerevisiae)                                                     | Sec8l1        |
| 231.5                                                                         | 36.758 | AV205680   | RIKEN cDNA 1700029M03 gene                                                      | 1700029M03Rik |
| 212.8                                                                         | 36.758 | AV260651   | Gene model 994, (NCBI)                                                          | ---           |
| 364.6                                                                         | 22.627 | BB432090   | gene model 1574, (NCBI)                                                         | Gm1574        |
| 204.1                                                                         | 13.929 | BG068960   | ---                                                                             | ---           |
| 375.2                                                                         | 12.126 | AK015487   | RIKEN cDNA 4930459C07 gene                                                      | 4930459C07Rik |
| 497.8                                                                         | 11.314 | AK020441   | RIKEN cDNA 9430027B09 gene                                                      | 9430027B09Rik |

|         |       |           |                                                                                       |               |
|---------|-------|-----------|---------------------------------------------------------------------------------------|---------------|
| 211.2   | 8.574 | BB022314  | Adult male pituitary gland cDNA, RIKEN full-length enriched library, clone:5330410G21 | ---           |
| 310.4   | 8.574 | AW122064  | 7 days neonate cerebellum cDNA, RIKEN full-length enriched library, clone:A730099H18  | ---           |
| 5575.4  | 8.574 | AK007420  | RIKEN cDNA 4933439C20 gene                                                            | 4933439C20Rik |
| 864.2   | 5.657 | A1646809  | RIKEN cDNA 1500026D16 gene                                                            | 1500026D16Rik |
| 590.2   | 5.657 | AK011834  | ---                                                                                   | ---           |
| 425.2   | 5.278 | BB548287  | ---                                                                                   | ---           |
| 836.7   | 4     | BB450758  | RIKEN cDNA 1810038L18 gene                                                            | 1810038L18Rik |
| 360.8   | 3.732 | BB432681  | RIKEN cDNA 5730513H21 gene                                                            | 5730513H21Rik |
| 4465.1  | 3.249 | AK013658  | RIKEN cDNA 2900046L07 gene                                                            | 2900046L07Rik |
| 380.3   | 3.249 | AK005221  | RIKEN cDNA 2610206C24 gene                                                            | 2610206C24Rik |
| 260.7   | 3.249 | BC027195  | ---                                                                                   | ---           |
| 256.8   | 3.031 | BB371300  | hypothetical LOC434179                                                                | LOC434179     |
| 2658.6  | 3.031 | BE991235  | ---                                                                                   | ---           |
| 771.6   | 2.828 | BB281667  | RIKEN cDNA C630016O21 gene                                                            | C630016O21Rik |
| 421.5   | 2.828 | AV171622  | RIKEN cDNA 3300001H21 gene                                                            | 3300001H21Rik |
| 1141.9  | 2.828 | BE824538  | hypothetical protein E130304D01                                                       | E130304D01    |
| 703.2   | 2.828 | BB710625  | 0 day neonate eyeball cDNA, RIKEN full-length enriched library, clone:E130307M10      | ---           |
| 4592.4  | 2.828 | AF071068  | ---                                                                                   | ---           |
| 751.7   | 2.639 | BB028755  | RIKEN cDNA 5430417L22 gene                                                            | 5430417L22Rik |
| 1042.4  | 2.639 | BC024599  | RIKEN cDNA 2810003C17 gene                                                            | 2810003C17Rik |
| 568.8   | 2.639 | BB545511  | 0 day neonate eyeball cDNA, RIKEN full-length enriched library, clone:E130304P04      | ---           |
| 5450    | 2.639 | BB164501  | ---                                                                                   | ---           |
| 603.4   | 2.639 | BE981473  | ---                                                                                   | ---           |
| 3452.7  | 2.639 | AV312368  | ---                                                                                   | ---           |
| 12937.4 | 2.639 | BE824713  | ---                                                                                   | ---           |
| 2058.5  | 2.639 | C80220    | ---                                                                                   | ---           |
| 728.8   | 2.462 | BB410295  | RIKEN cDNA 9830127L17 gene                                                            | 9830127L17Rik |
| 5755.5  | 2.462 | BB520013  | RIKEN cDNA 6430550H21 gene                                                            | 6430550H21Rik |
| 1902.2  | 2.462 | BB009277  | RIKEN cDNA 5730410E15 gene                                                            | 5730410E15Rik |
| 813.9   | 2.462 | BG067392  | RIKEN cDNA 2610028F08 gene                                                            | 2610028F08Rik |
| 9482.3  | 2.462 | BB131676  | RIKEN cDNA 1500012D20 gene                                                            | 1500012D20Rik |
| 775.5   | 2.462 | AK005121  | RIKEN cDNA 1500002K03 gene                                                            | 1500002K03Rik |
| 5704    | 2.462 | BB224153  | expressed sequence A1114950                                                           | A1114950      |
| 3667.8  | 2.462 | AV216370  | ---                                                                                   | ---           |
| 375.1   | 2.462 | BE988990  | ---                                                                                   | ---           |
| 511     | 2.297 | BM207556  | RIKEN cDNA 2900045N06 gene                                                            | 2900045N06Rik |
| 611.9   | 2.297 | AK019929  | RIKEN cDNA 2900002G04 gene                                                            | 2900002G04Rik |
| 817.3   | 2.297 | BF225441  | RIKEN cDNA 2210010L05 gene                                                            | 2210010L05Rik |
| 1850    | 2.297 | BE992311  | RIKEN cDNA 1110025L05 gene                                                            | 1110025L05Rik |
| 11663.6 | 2.297 | AK002371  | RIKEN cDNA 0610009C03 gene                                                            | 0610009C03Rik |
| 21976.7 | 2.297 | BB271021  | CDNA sequence AB023957                                                                | AB023957      |
| 18222.7 | 2.297 | AV111078  | ---                                                                                   | ---           |
| 13796.8 | 2.297 | AV170241  | ---                                                                                   | ---           |
| 65883.5 | 2.297 | BB369191  | ---                                                                                   | ---           |
| 2698.7  | 2.297 | AV212294  | ---                                                                                   | ---           |
| 1084.5  | 2.297 | BB469763  | ---                                                                                   | ---           |
| 1734.5  | 2.297 | BB227199  | ---                                                                                   | ---           |
| 6751    | 2.297 | BB380053  | ---                                                                                   | ---           |
| 9700.2  | 2.144 | A1853644  | RIKEN cDNA 9430072K23 gene                                                            | 9430072K23Rik |
| 3294.2  | 2.144 | AK011167  | RIKEN cDNA 5930416I19 gene                                                            | 5930416I19Rik |
| 765.5   | 2.144 | AA185884  | RIKEN cDNA 5730488B01 gene                                                            | 5730488B01Rik |
| 3283.9  | 2.144 | AV218922  | RIKEN cDNA 2610002J02 gene                                                            | 2610002J02Rik |
| 2028.1  | 2.144 | BB461323  | RIKEN cDNA 1200015N20 gene                                                            | 1200015N20Rik |
| 483.5   | 2.144 | NM_013788 | paternally expressed 12                                                               | Peg12         |
| 5977.4  | 2.144 | AV216686  | ---                                                                                   | ---           |
| 4397.6  | 2.144 | AV117555  | ---                                                                                   | ---           |
| 1449.5  | 2.144 | BI653033  | ---                                                                                   | ---           |
| 41912   | 2.144 | BB453676  | ---                                                                                   | ---           |
| 1173.3  | 2.144 | AV333371  | ---                                                                                   | ---           |
| 10237.5 | 2     | BG070683  | Transcribed locus, weakly similar to XP_510868.1                                      | ---           |
| 947.5   | 2     | BB397841  | Transcribed locus                                                                     | ---           |
| 1827.2  | 2     | AV267590  | RIKEN cDNA 5730494M16 gene                                                            | 5730494M16Rik |
| 226     | 2     | NM_054100 | RIKEN cDNA 2310034C09 gene                                                            | 2310034C09Rik |
| 2336.1  | 2     | BB541793  | cDNA sequence BC059842                                                                | BC059842      |
| 2343.2  | 2     | BB158599  | 16 days neonate thymus cDNA, RIKEN full-length enriched library, clone                | ---           |
| 4742.8  | 2     | C80049    | ---                                                                                   | ---           |
| 988     | 2     | NM_021416 | ---                                                                                   | ---           |
| 10511.3 | 2     | BB422726  | ---                                                                                   | ---           |
| 5185.8  | 2     | AV023830  | ---                                                                                   | ---           |
