# Supplementary material
Source: PubMed Central journal article supplement (PMC4896488)

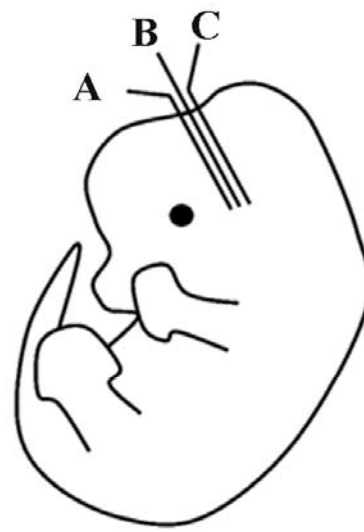

***wt* E12.5**

***ak* E12.5**

**embryo 1**

**embryo 2**

**embryo 1**

**embryo 2**

**A**

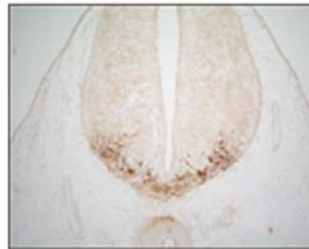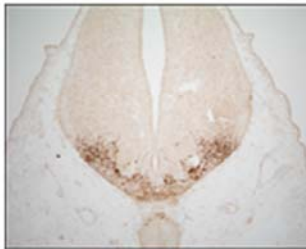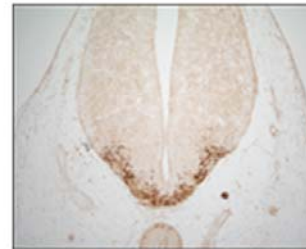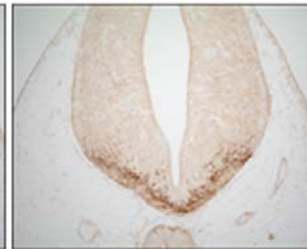

**B**

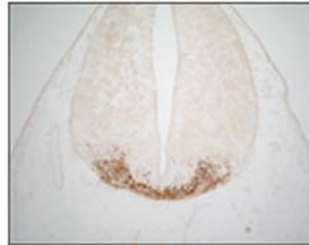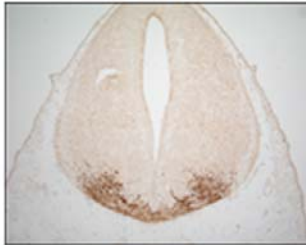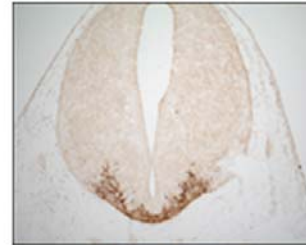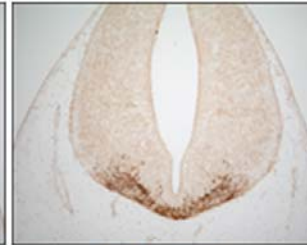

**C**

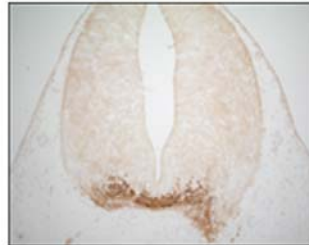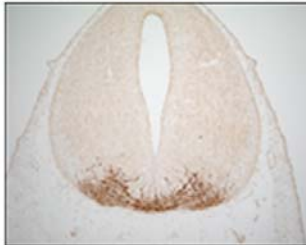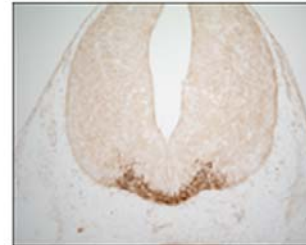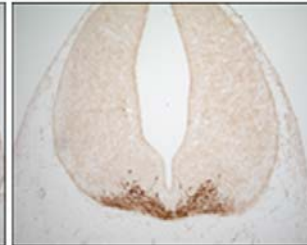

**E14.5**

**Wt**

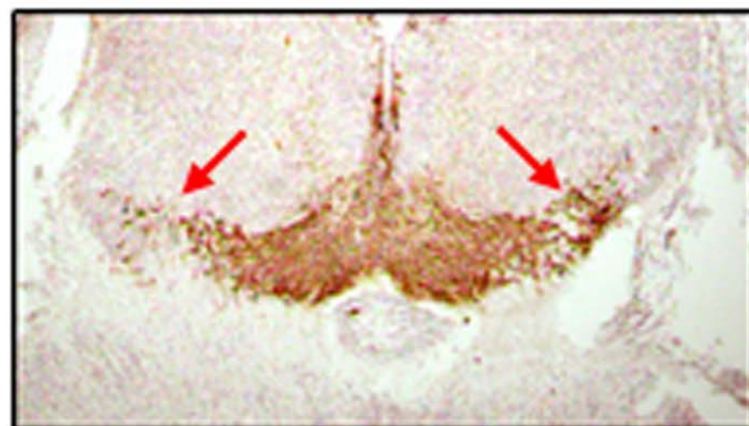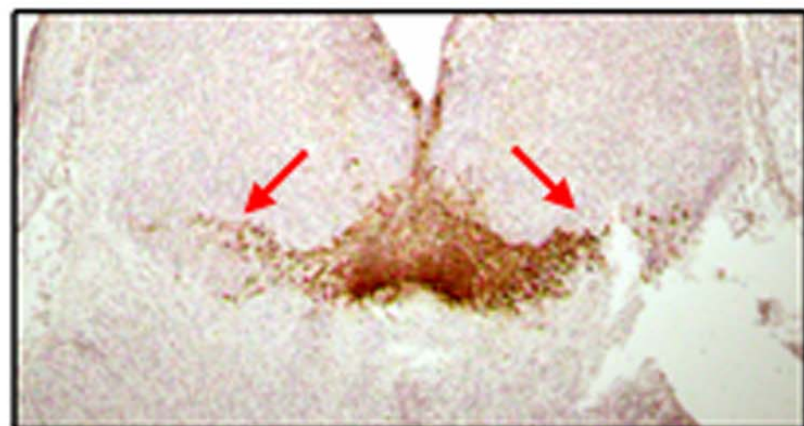

**Ak**

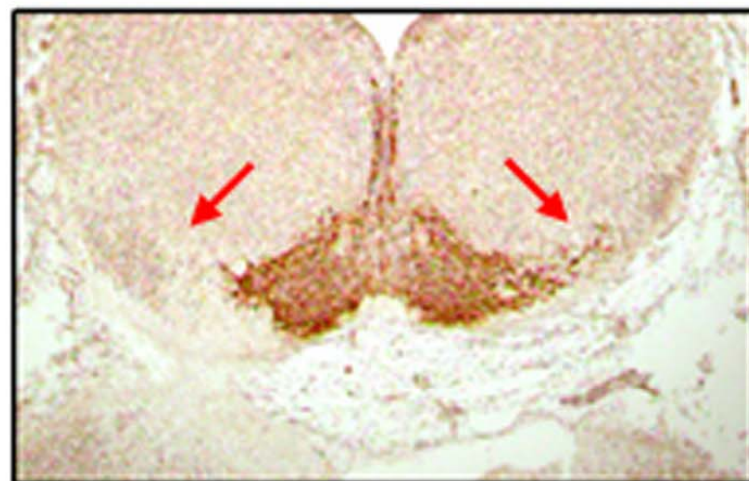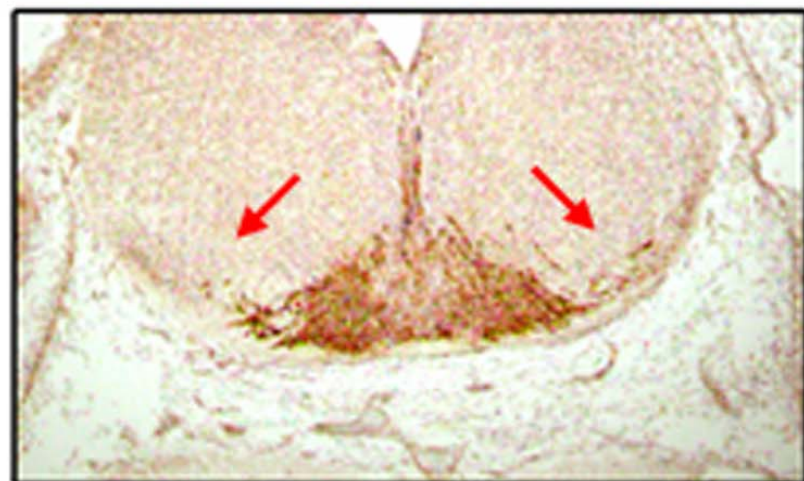

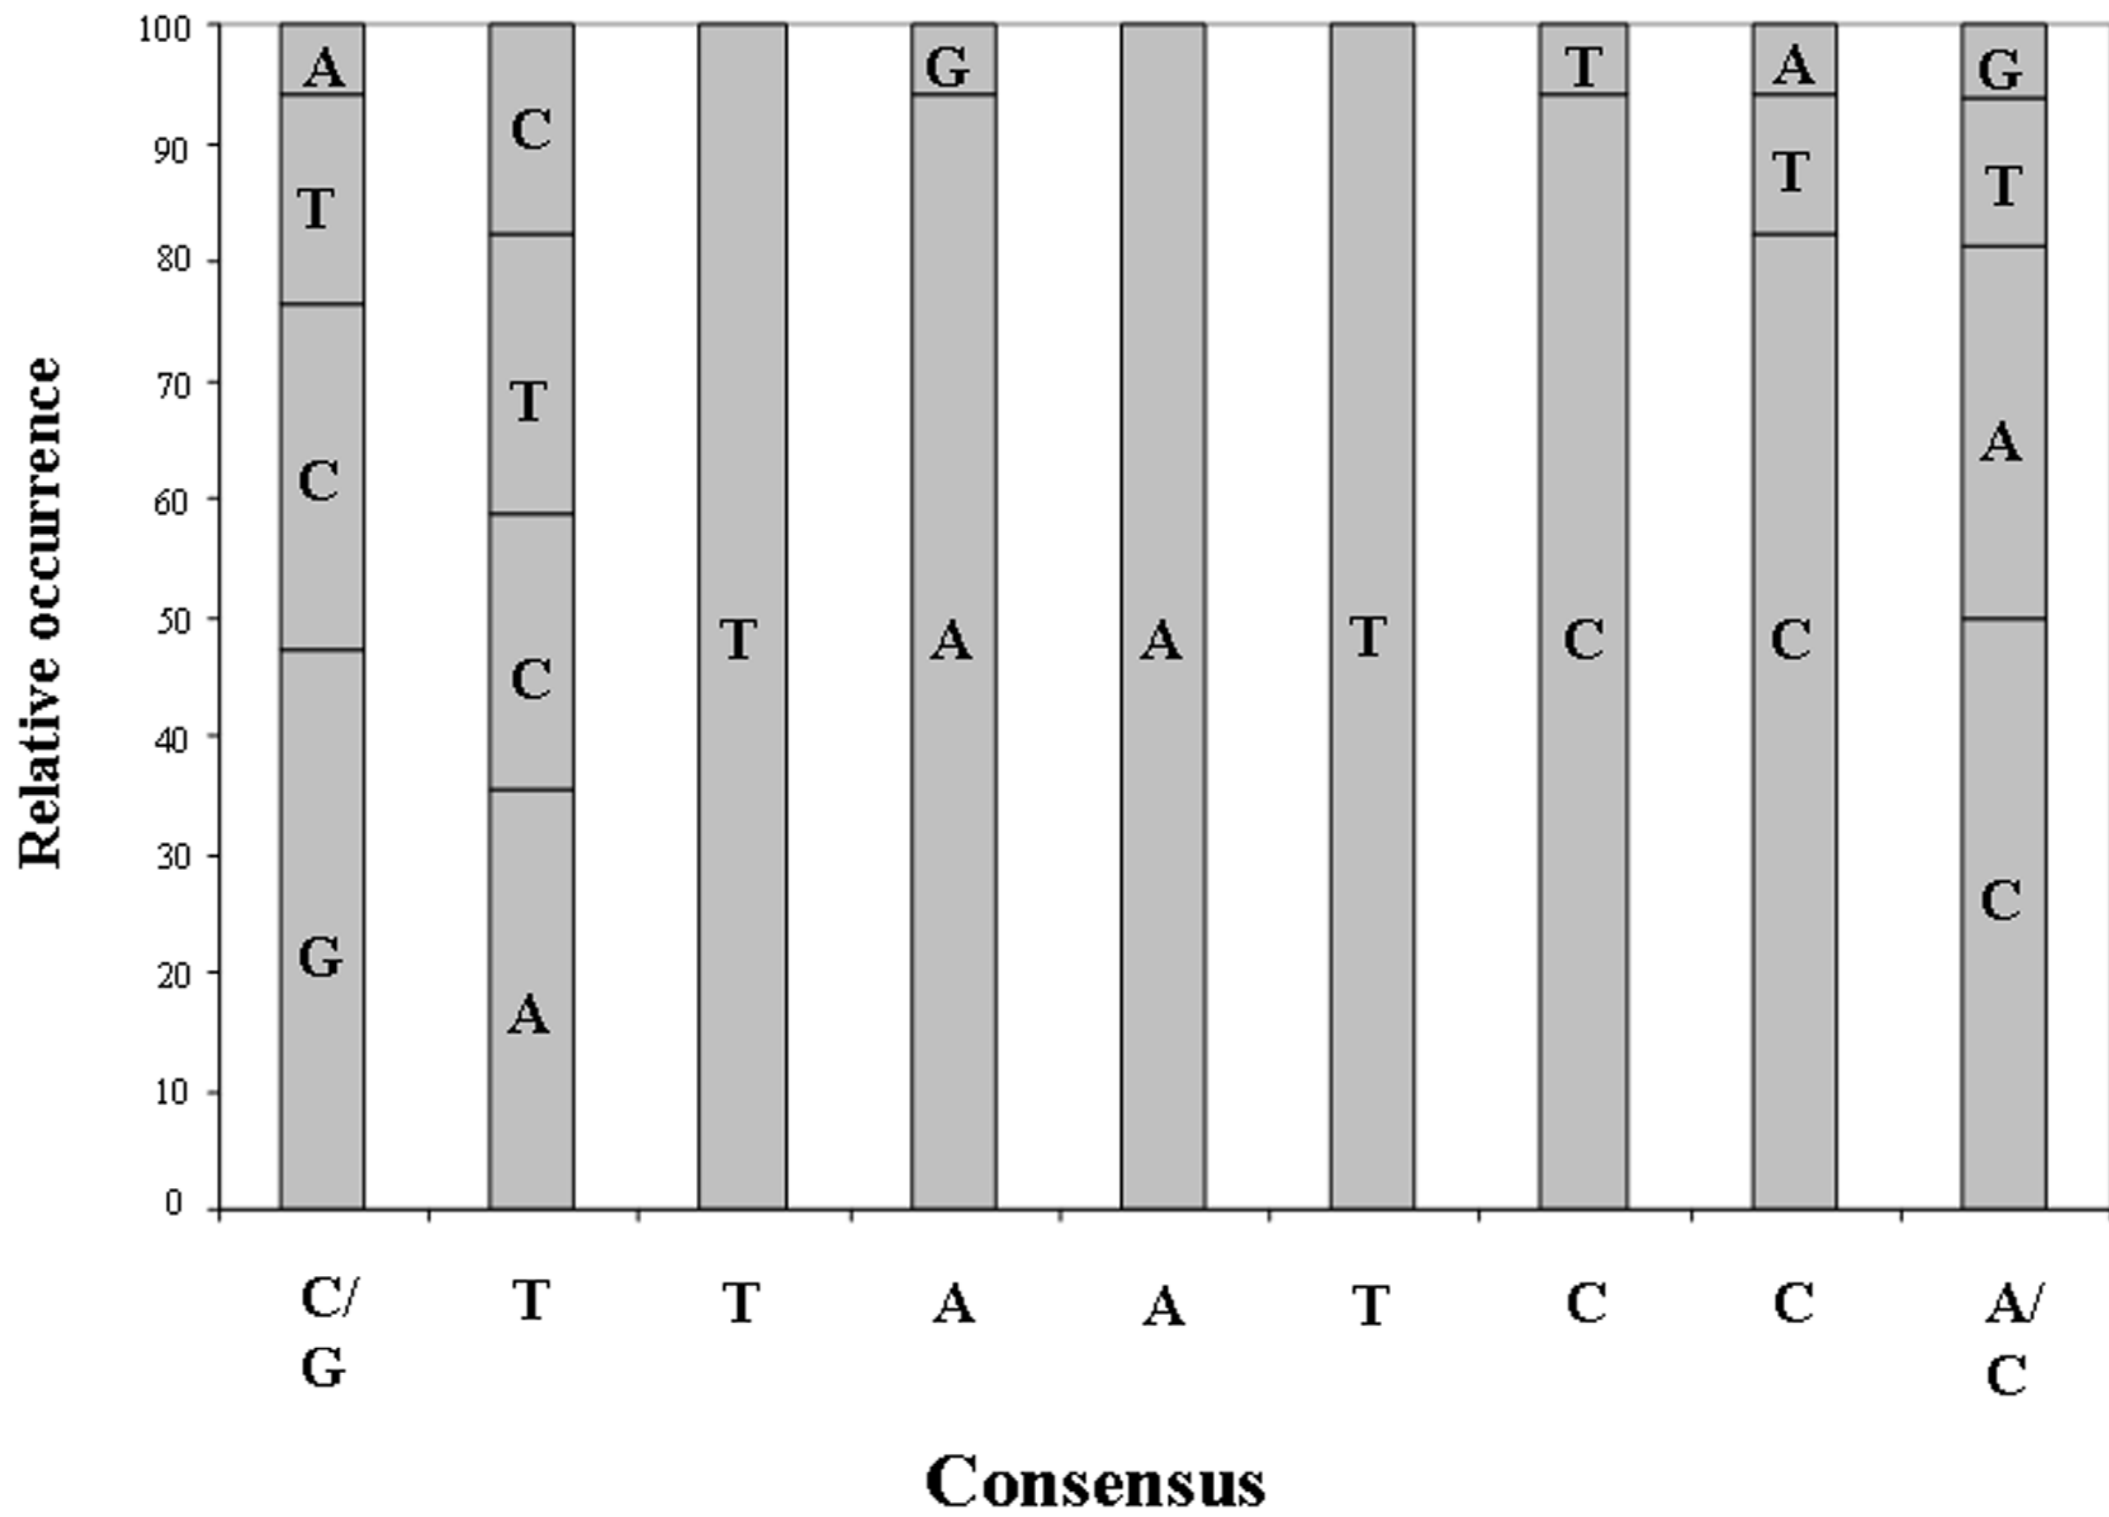

Supplement: NIHMS790554-supplement-Figures_1_2__3.pdf [file NIHMS790554-supplement-Figures_1_2__3.pdf]
